# Supplementary material
Source: publisher site journal article supplement (https://www.kjim.org/upload/media/kjim-2025-171-Supplementary-Table-1.pdf)
Supplement: Supplementary file 1 [file kjim-2025-171-Supplementary-Table-1.pdf]

**Supplementary Table 1. Definitions of diseases**

| Disease                    | ICD-10 code                                        |
|----------------------------|----------------------------------------------------|
| Hepatic failure            | K72 with at least one claim                        |
| Inflammatory liver disease | K75 with at least one claim                        |
| Liver cirrhosis            | K74, I98.2, I98.3 or I86.4 with at least one claim |
| Chronic hepatitis          | K73 with at least one claim                        |
| Cholecystitis, cholangitis | K81 or K83 with at least one claim                 |
| Cholelithiasis             | K80 with at least one claim                        |
| Acute pancreatitis         | K85 with at least one claim                        |
| Others <sup>a)</sup>       | K82 or K86 with at least one claim                 |

ICD-10, International Classification of Diseases, 10th edition.

<sup>a)</sup>Others include other diseases of the gallbladder and the pancreas.
